# Supplementary material
Source: PubMed Central journal article supplement (PMC11653773)
Supplement: NIHMS2040973-supplement-Suppemental_Files.pdf [file NIHMS2040973-supplement-Suppemental_Files.pdf]

**ONLINE ONLY**

## **Supplemental material**

**Association of germinal matrix hemorrhage volume with neurodevelopment and hydrocephalus**

Yang et al.

<https://thejns.org/doi/abs/10.3171/2024.3.PEDS22376>

**DISCLAIMER** The *Journal of Neurosurgery* acknowledges that the following section is published verbatim as submitted by the authors and did not go through either the *Journal's* peer-review or editing process.

Supplementary Table 1. Clinical and radiologic factors and their association with global performance

| Univariate Analysis                                   | Needs assistance with ADLs          |                | Walks freely                           |                | Symmetrical gait                       |                | Toe-walking                         |                | Cerebral palsy diagnosis            |                 |
|-------------------------------------------------------|-------------------------------------|----------------|----------------------------------------|----------------|----------------------------------------|----------------|-------------------------------------|----------------|-------------------------------------|-----------------|
|                                                       | Yes                                 | No             | Yes                                    | No             | Yes                                    | No             | Yes                                 | No             | Yes                                 | No              |
| Estimated GA, mean (SD), weeks                        | 25 (1.48)                           | 24.9 (2.13)    | 24.9 (2.02)                            | 25.2 (1.54)    | 25.3 (2.21)                            | 24.4 (1.12)    | 25.7 (1.23)                         | 25.5           | 24.8 (1.24)                         | 25.4 (2.93)     |
| Male sex, no. (%)                                     | 9 (81.8)                            | 17 (60.7)      | 22 (68.8)                              | 7 (63.6)       | 17 (65.4)                              | 12 (70.6)      | 14 (70)                             | 14 (73.7)      | 22 (73.3)                           | 7 (53.8)        |
| Birth weight (g)                                      | 858.2 (202.9)                       | 813.4 (176.8)  | 837.3 (171.6)                          | 829.1 (207.5)  | 878.3 (196.6)                          | 769.4 (126.4)  | 800 (131.8)                         | 895 (219.1)    | 826.7 (152.5)                       | 855 (234.8)     |
| Medical risk index, median (IQR)                      | 3 (2-5)                             | 3 (1.25-5)     | 3 (2-5)                                | 3 (2-5)        | 3 (1-4)                                | 4 (2-5)        | 4 (2.24-5)                          | 3 (1-4)        | 3 (2-5)                             | 3 (1-4.5)       |
| Sociodemographic Stressor Index, median (IQR)         | 2 (0-3)                             | 2 (0-3)        | 2 (0-3)                                | 2 (0-2)        | 2 (0-3)                                | 2 (0-2.5)      | 2 (0-2.75)                          | 2 (0-3)        | 2 (0-2.25)                          | 2 (0.5-3.5)     |
| Number of general anesthesia events, median (IQR)     | 4 (3-6)                             | 2.5 (1-6)      | 2 (1-5.75)                             | 4 (3-8)        | 2 (0.75-6)                             | 4 (3-7)        | 3.5 (1.5-6)                         | 2 (0-6)        | 3.5 (1-6)                           | 2 (0.5-4.5)     |
| Left GMH volume (cm <sup>3</sup> )                    | 0.230 (0.192)                       | 0.112 (0.104)  | 0.115 (0.107)                          | 0.234 (0.188)  | 0.080 (0.064)                          | 0.240 (1.68)   | 0.195 (0.168)                       | 0.082 (0.065)  | 0.177 (0.153)                       | 0.0643 (0.0416) |
| Right GMH volume (cm <sup>3</sup> )                   | 0.544 (0.687)                       | 0.239 (0.243)  | 0.225 (0.273)                          | 0.533 (0.654)  | 0.270 (0.439)                          | 0.368 (0.416)  | 0.323 (0.340)                       | 0.344 (0.537)  | 0.359 (0.491)                       | 0.193 (0.183)   |
| Total GMH volume (cm <sup>3</sup> )                   | 0.774 (0.731)                       | 0.326 (0.274)  | 0.311 (0.275)                          | 0.767 (0.721)  | 0.324 (0.437)                          | 0.587 (0.484)  | 0.476 (0.440)                       | 0.403 (0.539)  | 0.512 (0.530)                       | 0.232 (0.178)   |
| Left PVHI volume (cm <sup>3</sup> )                   | 1.09 (1.17)                         | 0.802 (0.992)  | 0.721 (0.961)                          | 1.51 (1.17)    | 0.494 (0.941)                          | 1.30 (1.07)    | 1.13 (1.06)                         | 0.604 (1.12)   | 1.23 (1.10)                         | 0.129 (0.194)   |
| Right PVHI volume (cm <sup>3</sup> )                  | 2.19 (3.15)                         | 1.51 (1.58)    | 0.706 (0.665)                          | 4.41 (2.86)    | 1.29 (1.29)                            | 2.22 (3.13)    | 2.60 (3.05)                         | 1.15 (1.20)    | 2.31 (2.59)                         | 0.595 (0.635)   |
| <b>Unadjusted logistic regression model</b>           | <b>OR (95% CI)</b>                  | <b>P value</b> | <b>OR (95% CI)</b>                     | <b>P value</b> | <b>OR (95% CI)</b>                     | <b>P value</b> | <b>OR (95% CI)</b>                  | <b>P value</b> | <b>OR (95% CI)</b>                  | <b>P value</b>  |
| Estimated GA, mean (SD), weeks                        | 1.03 (0.723-1.46) <sup>a</sup>      | .876           | 0.930 (0.659-1.31) <sup>a</sup>        | .677           | 1.50 (0.896-2.52) <sup>a</sup>         | .123           | .767 (.502-1.17) <sup>a</sup>       | .219           | 0.856 (0.609-1.203) <sup>a</sup>    | 0.370           |
| Male sex, no. (%)                                     | 2.91 (0.527-16.1) <sup>a</sup>      | .220           | 1.26 (0.298-5.30) <sup>a</sup>         | .755           | 0.787 (0.210-2.95) <sup>a</sup>        | .722           | .833 (.206-3.39) <sup>a</sup>       | .798           | 1.33 (0.606-9.16) <sup>a</sup>      | 0.216           |
| Birth weight (g)                                      | 1.01 (0.980-1.05) <sup>b</sup>      | .490           | 1.00 (0.961-1.04) <sup>b</sup>         | .894           | 1.04 (1-1.09) <sup>b</sup>             | .061           | .970 (.932-1.01) <sup>b</sup>       | .119           | 0.999 (0.996-1.003) <sup>b</sup>    | 0.631           |
| Medical risk index, median (IQR)                      | 1.08 (0.751-1.55) <sup>a</sup>      | .685           | 1.02 (0.709-1.47) <sup>a</sup>         | .914           | 0.74 (0.523-1.05) <sup>a</sup>         | .094           | 1.44 (.983-2.11) <sup>a</sup>       | .061           | 1.18 (0.825-1.70) <sup>a</sup>      | 0.362           |
| Sociodemographic Stressor Index, median (IQR)         | 0.997 (0.641-1.55) <sup>a</sup>     | .991           | 1.16 (0.727-1.84) <sup>a</sup>         | .540           | 1.08 (0.721-1.62) <sup>a</sup>         | .703           | 1.01 (.665-1.52) <sup>a</sup>       | .970           | 0.714 (0.457-1.12) <sup>a</sup>     | 0.139           |
| Number of general anesthesia events, median (IQR)     | 1.13 (0.936-1.36) <sup>a</sup>      | .207           | 0.830 (0.682-1.01) <sup>a</sup>        | .061           | <b>0.803 (0.652-0.989)<sup>a</sup></b> | <b>.039</b>    | 1.07 (.892-1.27) <sup>a</sup>       | .484           | 1.27 (0.965-1.68) <sup>a</sup>      | 0.087           |
| Left GMH volume (cm <sup>3</sup> )                    | <b>1.78 (1.03-3.34)<sup>c</sup></b> | <b>.040</b>    | <b>0.554 (0-0.943)<sup>c</sup></b>     | <b>.030</b>    | <b>0.272 (0.000-0.833)<sup>c</sup></b> | <b>.004</b>    | <b>2.53 (1.09-5.87)<sup>c</sup></b> | <b>.030</b>    | <b>3.80 (1.01-14.3)<sup>c</sup></b> | <b>0.049</b>    |
| Right GMH volume (cm <sup>3</sup> )                   | 1.18 (0.974-1.43) <sup>c</sup>      | .090           | 0.845 (0.699-1.02) <sup>c</sup>        | .079           | 0.947 (0.814-1.10) <sup>c</sup>        | .481           | .989 (.852-1.15) <sup>c</sup>       | .888           | 1.15 (0.895-1.15) <sup>c</sup>      | 0.278           |
| Total GMH volume (cm <sup>3</sup> )                   | <b>1.22 (1.02-1.47)<sup>c</sup></b> | <b>.031</b>    | <b>0.809 (0.673-0.972)<sup>c</sup></b> | <b>.023</b>    | 0.875 (0.747-1.03) <sup>c</sup>        | .099           | 1.03 (.903-1.18) <sup>c</sup>       | .637           | 1.32 (0.949-1.83) <sup>c</sup>      | 0.100           |
| Left PVHI volume (cm <sup>3</sup> )                   | 1.03 (0.929-1.14) <sup>c</sup>      | .585           | 0.930 (0.842-1.03) <sup>c</sup>        | .148           | 0.911 (0.804-1.03) <sup>c</sup>        | .144           | 1.06 (.935-1.20) <sup>c</sup>       | .370           | 1.49 (0.806-2.77) <sup>c</sup>      | 0.202           |
| Right PVHI volume (cm <sup>3</sup> )                  | 1.01 (0.971-1.06) <sup>c</sup>      | .531           | <b>0.833 (0.702-0.989)<sup>c</sup></b> | <b>.037</b>    | 0.980 (0.936-1.03) <sup>c</sup>        | .381           | 1.04 (.977-1.10) <sup>c</sup>       | .235           | 1.10 (0.961-1.27) <sup>c</sup>      | 0.162           |
| <b>Multivariable model</b>                            |                                     |                |                                        |                |                                        |                |                                     |                |                                     |                 |
| Left GMH volume (cm <sup>3</sup> ) <sup>%</sup>       | 1.66 (0.897-3.07) <sup>c</sup>      | .106           | 0.600 (.000-1.09) <sup>c</sup>         | .095           | <b>0.246 (.000-0.733)<sup>c</sup></b>  | <b>.012</b>    | <b>2.48 (1.04-5.92)<sup>c</sup></b> | <b>.041</b>    | 2.87 (0.774-10.6) <sup>c</sup>      | 0.115           |
| Right GMH volume (cm <sup>3</sup> ) <sup>%</sup>      | 1.16 (0.947-1.43) <sup>c</sup>      | .149           | 0.906 (0.747-1.10) <sup>c</sup>        | .312           | 0.958 (0.793-1.16) <sup>c</sup>        | .660           | 1.01 (0.829-1.23) <sup>c</sup>      | .919           | 1.28 (0.800-2.04) <sup>c</sup>      | 0.303           |
| Total GMH volume (cm <sup>3</sup> ) <sup>@</sup>      | <b>1.24 (1.01-1.51)<sup>c</sup></b> | <b>.038</b>    | 0.843 (0.697-1.02) <sup>c</sup>        | .079           | 0.869 (0.732-1.03) <sup>c</sup>        | .110           | 1.10 (0.948-1.28) <sup>c</sup>      | .248           | 1.37 (0.933-2.02) <sup>c</sup>      | 0.108           |
| Left PVHI volume (cm <sup>3</sup> ) <sup>#</sup>      | 1.02 (0.924-1.13) <sup>c</sup>      | .650           | 0.934 (0.846-1.03) <sup>c</sup>        | .181           | 0.911 (0.713-1.32) <sup>c</sup>        | .149           | 1.06 (0.931-1.20) <sup>c</sup>      | .392           | 1.52 (0.864-2.67) <sup>c</sup>      | 0.146           |
| Right PVHI volume (cm <sup>3</sup> ) <sup>#</sup>     | 1.10 (0.969-1.06) <sup>c</sup>      | .585           | <b>0.831 (0.694-0.994)<sup>c</sup></b> | <b>.042</b>    | 0.981 (0.936-1.03) <sup>c</sup>        | .416           | 1.04 (0.978-1.10) <sup>c</sup>      | .231           | 1.39 (0.929-2.09) <sup>c</sup>      | 0.109           |
| Left PVHI volume (cm <sup>3</sup> ) <sup>&amp;</sup>  | 1.29 (0.941-1.77) <sup>c</sup>      | .113           | 0.909 (0.806-1.02) <sup>c</sup>        | .118           | 0.887 (0.772-1.02) <sup>c</sup>        | .090           | 1.11 (0.961-1.29) <sup>c</sup>      | .154           | 1.59 (0.829-3.05) <sup>c</sup>      | 0.162           |
| Right PVHI volume (cm <sup>3</sup> ) <sup>&amp;</sup> | 1.01 (0.968-1.06) <sup>c</sup>      | .603           | 0.833 (0.702-0.989) <sup>c</sup>       | .037           | 0.983 (0.933-1.03) <sup>c</sup>        | .507           | 1.04 (0.956-1.12) <sup>c</sup>      | .390           | 1.14 (0.957-1.35) <sup>c</sup>      | 0.147           |

\*The odds ratios of continuous variables have different units: a) per 1-unit increase, b) per 10-unit increase, c) per 0.1-unit increase, d) per 0.01-unit increase. The odds ratios of categorical variables are male vs. female (reference group), or yes vs. no (reference group)

‰: controlling for medical risk index, number of general anesthesia events, and contralateral GMH volume

@: controlling for medical risk index and number of general anesthesia events

#: controlling for presence of contralateral GMH volume

&: controlling for presence of contralateral PVHI volume

Bolded values indicate  $P < .05$

GA: gestational age

OR: odds ratio

SD: standard deviation

g: grams

GMH: germinal matrix hemorrhage

IQR: interquartile range

FTHR: fronto-temporal horn ratio

Supplementary Table 2. Correlation between hemorrhage volumes and ventricular size as measured by FTHR

| Relationship                                  | Correlation coefficient, $P$ value |
|-----------------------------------------------|------------------------------------|
| Left GMH volume (cm <sup>3</sup> ) and FTHR   | <b>+0.3113, .04</b>                |
| Right GMH volume (cm <sup>3</sup> ) and FTHR  | +0.0841, .59                       |
| Left PVHI volume (cm <sup>3</sup> ) and FTHR  | +0.0501, .84                       |
| Right PVHI volume (cm <sup>3</sup> ) and FTHR | -0.0305, .90                       |

$P$  value calculated using Pearson's correlation analysis

Bolded values indicate  $P < .05$

GMH: germinal matrix hemorrhage

FTHR: fronto-temporal horn ratio

PVHI: periventricular hemorrhagic infarction

Supplementary Table 3. Comparison between high-grade GMH-IVH and grade II GMH-IVH without contralateral higher-grade hemorrhage

| Radiologic characteristics                     | Grade II<br>(n=12) | Grade III/IV<br>(n=38) | $P$ value*      |
|------------------------------------------------|--------------------|------------------------|-----------------|
| Right GMH volume (cm <sup>3</sup> ), mean (SD) | 0.07 (0.05)        | 0.32 (0.43)            | <b>&lt;.001</b> |
| FTHR, mean (SD)                                | 0.41 (0.04)        | 0.52 (0.08)            | <b>&lt;.001</b> |
|                                                | Grade II<br>(n=12) | Grade III/IV<br>(n=39) |                 |
| Left GMH volume (cm <sup>3</sup> ), mean (SD)  | 0.06 (0.03)        | 0.15 (0.14)            | <b>.001</b>     |
| FTHR, mean (SD)                                | 0.41 (0.04)        | 0.52 (0.09)            | <b>&lt;.001</b> |

\* $P$  value calculated using Student's  $t$ -test

Bolded values indicate  $P < .05$

GMH-IVH: germinal matrix hemorrhage-intraventricular hemorrhage

GMH: germinal matrix hemorrhage

FTHR: fronto-temporal horn ratio

Total grade II patients = 15 and total grade III/IV patients = 43. Table delineated by laterality of GMH.

Supplementary Table 4. Shunt complications and neurodevelopmental outcomes by 2 years corrected age

| Shunt revision <sup>^</sup> | Bayley-III composite score, mean (SD) |         |             |         |             |         |
|-----------------------------|---------------------------------------|---------|-------------|---------|-------------|---------|
|                             | Cognition                             | P value | Language    | P value | Motor       | P value |
| No shunt revisions (n=9)    | 71.7 (13.7)                           | .85     | 77.7 (16.4) | .96     | 69.3 (16.3) | .46     |
| One revision (n=6)          | 73.3 (11.3)                           |         | 76.8 (10.9) |         | 61.0 (9.3)  |         |
| Two or more revisions (n=4) | 68.8 (9.5)                            |         | 74.7 (16.9) |         | 63.2 (7.5)  |         |
| <b>Shunt infection*</b>     |                                       |         |             |         |             |         |
| Yes (n=2)                   | 72.5 (3.5)                            | .81     | 89 (0)      | .799    | 67.0 (0)    | .61     |
| No (n=17)                   | 71.5 (12.3)                           |         | 76.2 (14.1) |         | 65.2 (13.7) |         |

<sup>^</sup>P values calculated using one-way ANOVA

\*P values calculated using Student's t-test

Supplementary Table 5. Hemorrhage lengths and their association with neurodevelopmental outcomes

| Unadjusted linear regression model      | Estimated change in Bayley-III composite score*, SE (P value) |                           |                           |
|-----------------------------------------|---------------------------------------------------------------|---------------------------|---------------------------|
|                                         | Cognition                                                     | Language                  | Motor                     |
| Left GMH length (cm)                    | -11.0, 6.40 (.093)                                            | -7.06, 8.62 (.418)        | -12.3, 6.65 (.073)        |
| Right GMH length (cm)                   | -6.18, 4.00 (.130)                                            | -8.71, 5.34 (.112)        | -3.50, 4.19 (.410)        |
| Total GMH length (cm)                   | -4.10, 2.36 (.090)                                            | -5.66, 2.98 (.065)        | <b>-5.67, 2.40 (.023)</b> |
| Left PVHI length (cm)                   | -4.57, 4.01 (.271)                                            | -9.59, 5.73 (.116)        | <b>-7.46, 3.50 (.049)</b> |
| Right PVHI length (cm)                  | -4.81, 3.13 (.144)                                            | -6.26, 4.12 (.150)        | <b>-7.92, 3.39 (.033)</b> |
| <b>Multivariable model</b>              |                                                               |                           |                           |
| Left GMH length (cm) <sup>%</sup>       | -12.4, 6.27 (.057)                                            | -10.3, 8.73 (.247)        | <b>-14.1, 6.14 (.028)</b> |
| Right GMH length (cm) <sup>%</sup>      | <b>-9.03, 3.81 (.024)</b>                                     | <b>-12.3, 5.43 (.031)</b> | -7.34, 4.69 (.128)        |
| Total GMH length (cm) <sup>@</sup>      | -4.35, 2.31 (.067)                                            | <b>-6.64, 2.94 (.030)</b> | <b>-5.88, 2.25 (.013)</b> |
| Left PVHI length (cm) <sup>#</sup>      | -4.63, 4.13 (.280)                                            | -9.41, 5.92 (.136)        | -7.42, 3.61 (.058)        |
| Right PVHI length (cm) <sup>#</sup>     | -5.25, 3.06 (.107)                                            | -6.56, 4.16 (.137)        | <b>-8.34, 3.36 (.026)</b> |
| Left PVHI length (cm) <sup>&amp;</sup>  | -7.20, 4.09 (.099)                                            | -14.2, 10.1 (.185)        | <b>-14.2, 5.34 (.018)</b> |
| Right PVHI length (cm) <sup>&amp;</sup> | -4.46, 3.09 (.168)                                            | -6.23, 4.26 (.166)        | <b>-7.51, 3.30 (.038)</b> |
| Left PVHI length (cm) <sup>§</sup>      | -11.7, 6.14 (.064)                                            | -7.65, 8.30 (.363)        | <b>-13.1, 6.26 (.043)</b> |
| Right PVHI length (cm) <sup>§</sup>     | -5.76, 2.70 (.050)                                            | -6.83, 4.13 (.120)        | <b>-9.06, 2.76 (.005)</b> |
| Left PVHI length (cm) <sup>Δ</sup>      | -2.37, 4.10 (.571)                                            | -1.45, 1.83 (.444)        | -5.78, 3.64 (.134)        |
| Right PVHI length (cm) <sup>Δ</sup>     | -2.84, 3.16 (.384)                                            | -5.77, 4.54 (.225)        | -6.09, 3.52 (.104)        |

\*estimated change of composite score with one unit increasing in the continuous factors or estimated score difference between two groups (yes minus no) for categorical factors

<sup>%</sup>: controlling for medical risk index, number of general anesthesia events, and contralateral GMH length

<sup>@</sup>: controlling for medical risk index and number of general anesthesia events

<sup>#</sup>: controlling for presence of contralateral GMH length

<sup>&</sup>: controlling for presence of contralateral PVHI length

<sup>§</sup>: controlling for medical risk index

<sup>Δ</sup>: controlling for number of general anesthesia events

Bolded values indicate  $P < .05$

SE: standard error

GMH: germinal matrix hemorrhage

PVHI: periventricular hemorrhagic infarction

Supplementary Table 6. Hemorrhage lengths and their association with hydrocephalus outcomes

| <b>Unadjusted logistic regression model</b>        | <b>Shunt (n=19)</b> | <b>No shunt (n=24)</b> | <b>Odds ratio* (95% CI)</b> | <b>P value</b> |
|----------------------------------------------------|---------------------|------------------------|-----------------------------|----------------|
| Left GMH length (cm), mean (SD)                    | 1.09 (0.352)        | 0.851 (0.232)          | 1.33 (1.04-1.70)            | <b>.022</b>    |
| Right GMH length (cm), mean (SD)                   | 1.23 (0.546)        | 1.04 (0.484)           | 1.08 (0.949-1.22)           | .248           |
| Total GMH length (cm), mean (SD)                   | 2.08 (0.900)        | 1.65 (0.701)           | 1.07 (0.987-1.17)           | .095           |
| Left PVHI length (cm), mean (SD)                   | 1.58 (0.737)        | 1.38 (0.885)           | 1.03 (0.916-1.17)           | .587           |
| Right PVHI length (cm), mean (SD)                  | 2.13 (1.11)         | 1.57 (0.661)           | 1.08 (0.959-1.21)           | .212           |
| <b>Multivariable model</b>                         |                     |                        |                             |                |
| Left GMH length (cm), mean (SD) <sup>%</sup>       | 1.09 (0.352)        | 0.851 (0.232)          | 1.31 (0.991-1.74)           | .058           |
| Right GMH length (cm), mean (SD) <sup>%</sup>      | 1.23 (0.546)        | 1.04 (0.484)           | 1.13 (0.960-1.34)           | .139           |
| Total GMH length (cm), mean (SD) <sup>^</sup>      | 2.08 (0.900)        | 1.65 (0.701)           | 1.08 (0.983-1.19)           | .107           |
| Left PVHI length (cm), mean (SD) <sup>#</sup>      | 1.58 (0.737)        | 1.38 (0.885)           | 1.03 (0.909-1.17)           | .619           |
| Right PVHI length (cm), mean (SD) <sup>#</sup>     | 2.13 (1.11)         | 1.57 (0.661)           | 1.08 (0.958-1.21)           | .211           |
| Left PVHI length (cm), mean (SD) <sup>&amp;</sup>  | 1.58 (0.737)        | 1.38 (0.885)           | 1.10 (0.938-1.28)           | .250           |
| Right PVHI length (cm), mean (SD) <sup>&amp;</sup> | 2.13 (1.11)         | 1.57 (0.661)           | 1.08 (0.955-1.22)           | .224           |

\*The odds ratios of continuous variables are presented per 0.1-unit increase. The odds ratios of categorical variables are male vs. female (reference group), or yes vs. no (reference group)

<sup>^</sup>: controlling for FTHR, GA, and sex

<sup>%</sup>: controlling for FTHR, GA, sex, and contralateral GMH length

<sup>#</sup>: controlling for presence of contralateral grade GMH length

<sup>&</sup>: controlling for presence of contralateral grade PVHI length

Bolded values indicate  $P < .05$

SD: standard deviation
